# Supplementary material
Source: PubMed Central journal article supplement (PMC3247964)
Supplement: supp_M111.300111_jbc.M111.300111-1.pdf [file supp_M111.300111_jbc.M111.300111-1.pdf]

## Support Information

Fig. S1

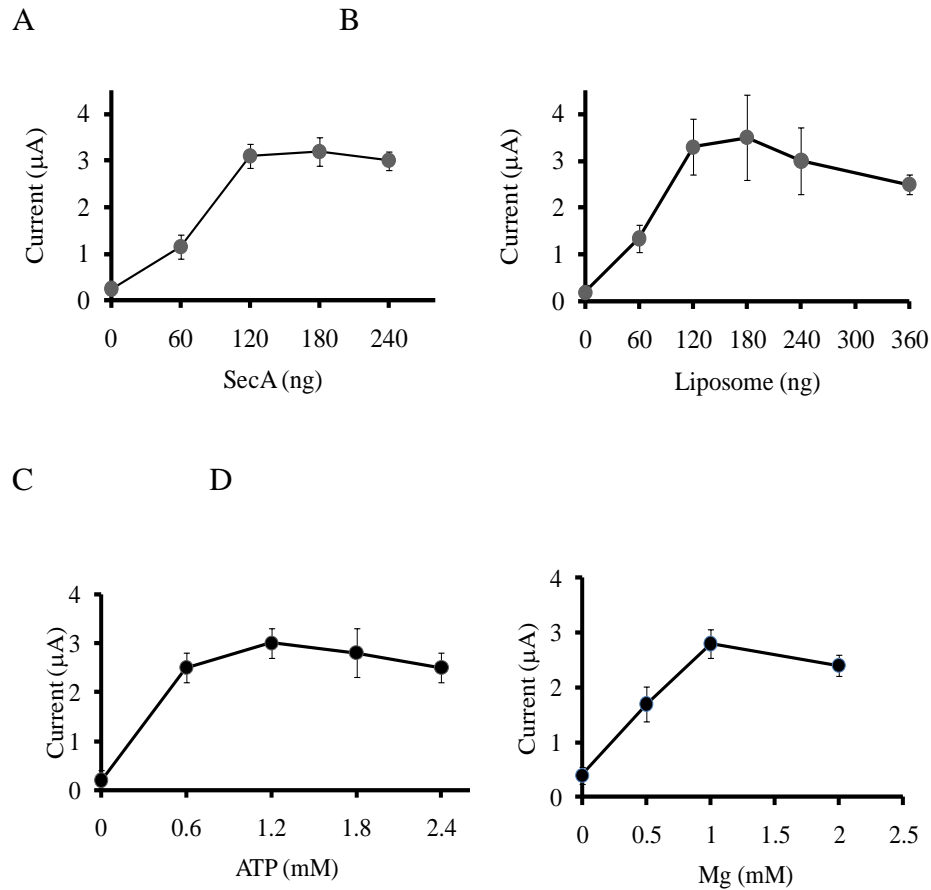

Fig. S1. Optimization of SecA ion-channel activity in the oocytes.

Titration of (A) SecA, (B) Liposomes, (C) ATP, and (D)  $\text{Mg}^{2+}$ . Injection mixtures in 50 nl contained: 120 ng liposomes, 1.2 mM ATP, 1 mM  $\text{Mg}^{2+}$ , 14 ng proOmpA and 120 ng SecA, excepted the tested component. The recording was 3 hours after injection.
